# Supplementary material
Source: MDPI journal article supplement (https://www.mdpi.com/2072-4292/14/13/3155)
Supplement: s1 [file s1]

**Table S1. Landsat 8 OLI and Sentinel 2-MSI A/B near- simultaneous overpass images used for spectral consistency analysis and band adjustment.**

| Location                   | Landsat OLI |            |                   |                     |                    | Sentinel-2 MSI |         |            |                   |                     |                    |
|----------------------------|-------------|------------|-------------------|---------------------|--------------------|----------------|---------|------------|-------------------|---------------------|--------------------|
|                            | Row/Path    | Date       | Scene Center Time | Solar Azimuth Angle | Solar Zenith Angle | Satellite      | Tile ID | Date       | Scene Center Time | Solar Azimuth Angle | Solar Zenith Angle |
| Yangtze River Estuary      | 118/39      | 2018/12/17 | 02:25             | 156.90              | 57.35              | S-2A           | T51RUP  | 2018/12/17 | 02:39             | 160.40              | 56.19              |
|                            |             |            |                   |                     |                    | S-2A           | T51RVP  | 2018/12/17 | 02:39             | 161.48              | 55.91              |
| Lake Tai Hu                | 119/38      | 2017/09/16 | 02:31             | 142.36              | 34.95              | S-2A           | T51RTQ  | 2017/09/16 | 02:45             | 148.91              | 32.27              |
|                            | 119/38      | 2018/02/23 | 02:30             | 145.68              | 48.13              | S-2A           | T51RTQ  | 2018/02/23 | 02:47             | 150.87              | 45.52              |
|                            | 119/38      | 2020/05/03 | 02:30             | 124.66              | 25.05              | S-2A           | T51RTQ  | 2020/05/03 | 02:49             | 131.76              | 21.4               |
| Lianyungang Coastal Area   | 120/36      | 2017/02/11 | 02:36             | 149.82              | 54.01              | S-2A           | T50SQD  | 2017/02/11 | 02:51             | 156.05              | 52.02              |
|                            | 120/36      | 2018/04/19 | 02:35             | 135.45              | 30.43              | S-2B           | T51STU  | 2018/04/19 | 02:47             | 141.86              | 28.44              |
| Hongze Lake<br>Gaoyou Lake | 120/37      | 2017/10/09 | 02:37             | 152.84              | 43.13              | S-2A           | T50SPB  | 2017/10/09 | 02:57             | 159.40              | 41.27              |
|                            |             |            |                   |                     |                    | S-2A           | T50SPC  | 2017/10/09 | 02:57             | 159.69              | 42.13              |
|                            |             |            |                   |                     |                    | S-2A           | T50SQB  | 2017/10/09 | 02:57             | 160.93              | 40.96              |
|                            | 120/37      | 2018/04/19 | 02:36             | 133.21              | 29.6               | S-2B           | T50SQB  | 2018/04/19 | 02:47             | 138.86              | 27.30              |
|                            | 120/37      | 2018/06/06 | 02:35             | 113.68              | 21.63              | S-2A           | T50SPB  | 2018/06/06 | 02:55             | 121.44              | 17.69              |
|                            |             |            |                   |                     |                    | S-2A           | T50SPC  | 2018/06/06 | 02:55             | 123.70              | 18.21              |
|                            |             |            |                   |                     |                    | S-2A           | T50SQB  | 2018/06/06 | 02:55             | 123.50              | 16.93              |
| Chaohu Lake                | 121/38      | 2019/11/23 | 02:43             | 158.92              | 54.87              | S-2B           | T50RNV  | 2019/11/23 | 02:50             | 163.31              | 53.16              |
|                            |             |            |                   |                     |                    | S-2B           | T50SNA  | 2019/11/23 | 02:58             | 163.44              | 54.04              |
| Poyang Lake                | 121/40      | 2017/11/01 | 02:44             | 155.45              | 46.77              | S-2A           | T50RMT  | 2017/11/01 | 03:07             | 163.63              | 45.28              |
|                            | 121/40      | 2018/04/10 | 02:43             | 129.75              | 30.08              | S-2A           | T50RMT  | 2018/04/10 | 03:04             | 141.06              | 26.39              |
| Hong Kong Coastal area     | 121/45      | 2016/12/16 | 02:46             | 152.73              | 50.04              | S-2A           | T49QHE  | 2016/12/16 | 03:11             | 159.44              | 48.17              |
| Dianchi Lake               | 129/43      | 2018/04/02 | 03:34             | 126.31              | 30.47              | S-2A           | T48RTN  | 2018/04/02 | 03:38             | 132.01              | 28.00              |
|                            | 129/43      | 2019/02/16 | 03:34             | 141.83              | 45.28              | S-2A           | T48RTN  | 2019/02/16 | 03:51             | 146.19              | 43.54              |
| Qinghai Lake               | 133/34      | 2019/11/27 | 03:56             | 161.40              | 60.77              | S-2B           | T47SPA  | 2019/11/27 | 04:18             | 167.31              | 58.63              |
| Ulungur Lake               | 144/27      | 2018/10/04 | 05:01             | 161.06              | 53.47              | S-2B           | T45TWN  | 2018/10/04 | 05:20             | 169.75              | 52.18              |
| Ebinur Lake                | 146/29      | 2017/08/28 | 05:14             | 148.98              | 38.65              | S-2A           | T44TPQ  | 2017/08/28 | 05:30             | 157.87              | 36.83              |
|                            | 146/29      | 2018/07/14 | 05:13             | 137.08              | 28.43              | S-2A           | T44TPQ  | 2018/07/14 | 05:33             | 148.00              | 25.84              |
|                            | 146/29      | 2019/04/12 | 05:13             | 149.45              | 39.68              | S-2B           | T44TPQ  | 2019/04/12 | 05:26             | 154.65              | 38.52              |

**Table S2. Landsat-8 OLI and Sentinel 2-MSI A/B images used for Total suspended solids (TSS) time series analysis over Hong Kong.**

| Satellite: Landsat-8 |                                          |
|----------------------|------------------------------------------|
| Sr #                 | Image ID                                 |
| 1                    | LC08_L1TP_121045_20130919_20170502_01_T1 |
| 2                    | LC08_L1TP_121045_20131005_20170429_01_T1 |
| 3                    | LC08_L1TP_122044_20131028_20170429_01_T1 |
| 4                    | LC08_L1TP_122044_20131129_20170428_01_T1 |
| 5                    | LC08_L1TP_122044_20131231_20170427_01_T1 |
| 6                    | LC08_L1TP_122044_20140116_20170426_01_T1 |
| 7                    | LC08_L1TP_121045_20140704_20170421_01_T1 |
| 8                    | LC08_L1TP_121045_20140906_20170419_01_T1 |
| 9                    | LC08_L1TP_122044_20140929_20170418_01_T1 |
| 10                   | LC08_L1TP_121045_20141008_20180205_01_T1 |
| 11                   | LC08_L1TP_122044_20141015_20170418_01_T1 |
| 12                   | LC08_L1TP_122044_20141116_20170417_01_T1 |
| 13                   | LC08_L1TP_121045_20141125_20170417_01_T1 |
| 14                   | LC08_L1TP_122044_20150103_20170415_01_T1 |
| 15                   | LC08_L1TP_122044_20150119_20170413_01_T1 |
| 16                   | LC08_L1TP_121045_20150213_20170413_01_T1 |
| 17                   | LC08_L1TP_121045_20150707_20170407_01_T1 |
| 18                   | LC08_L1TP_121045_20150808_20170406_01_T1 |
| 19                   | LC08_L1TP_121045_20150824_20170405_01_T1 |
| 20                   | LC08_L1TP_121045_20150909_20170404_01_T1 |
| 21                   | LC08_L1TP_121045_20150925_20170403_01_T1 |
| 22                   | LC08_L1TP_122044_20151018_20170403_01_T1 |
| 23                   | LC08_L1TP_121045_20151027_20170402_01_T1 |
| 24                   | LC08_L1TP_122044_20151119_20170401_01_T1 |
| 25                   | LC08_L1TP_121045_20151128_20170401_01_T1 |
| 26                   | LC08_L1TP_122044_20160106_20170404_01_T1 |
| 27                   | LC08_L1TP_122044_20160207_20170330_01_T1 |
| 28                   | LC08_L1TP_121045_20160303_20170328_01_T1 |
| 29                   | LC08_L1TP_122044_20160326_20170327_01_T1 |
| 30                   | LC08_L1TP_121045_20160522_20170324_01_T1 |
| 31                   | LC08_L1TP_121045_20160623_20170323_01_T1 |
| 32                   | LC08_L1TP_121045_20160725_20180205_01_T1 |
| 33                   | LC08_L1TP_121045_20160826_20170322_01_T1 |
| 34                   | LC08_L1TP_121045_20160927_20170320_01_T1 |
| 35                   | LC08_L1TP_122044_20161105_20170318_01_T1 |
| 36                   | LC08_L1TP_121045_20161114_20170318_01_T1 |
| 37                   | LC08_L1TP_122044_20161207_20170317_01_T1 |
| 38                   | LC08_L1TP_121045_20161216_20180205_01_T1 |
| 39                   | LC08_L1TP_122044_20170108_20170311_01_T1 |
| 40                   | LC08_L1TP_122044_20170209_20170217_01_T1 |
| 41                   | LC08_L1TP_121045_20170218_20170228_01_T1 |

| 42                      | LC08_L1TP_121045_20170407_20170414_01_T1                          |
|-------------------------|-------------------------------------------------------------------|
| 43                      | LC08_L1TP_121045_20170610_20170616_01_T1                          |
| 44                      | LC08_L1TP_121045_20170829_20170914_01_T1                          |
| 45                      | LC08_L1TP_121045_20170914_20170928_01_T1                          |
| 46                      | LC08_L1TP_122044_20171023_20171107_01_T1                          |
| 47                      | LC08_L1TP_121045_20171101_20171109_01_T1                          |
| 48                      | LC08_L1TP_121045_20171117_20171122_01_T1                          |
| 49                      | LC08_L1TP_121045_20171203_20171207_01_T1                          |
| 50                      | LC08_L1TP_122044_20171210_20171223_01_T1                          |
| 51                      | LC08_L1TP_121045_20171219_20171224_01_T1                          |
| 52                      | LC08_L1TP_122044_20180111_20180119_01_T1                          |
| 53                      | LC08_L1TP_122044_20180212_20180222_01_T1                          |
| 54                      | LC08_L1TP_121045_20180309_20180320_01_T1                          |
| 55                      | LC08_L1TP_121045_20180410_20180417_01_T1                          |
| 56                      | LC08_L1TP_121045_20180528_20180605_01_T1                          |
| 57                      | LC08_L1TP_121045_20181003_20181010_01_T1                          |
| 58                      | LC08_L1TP_122044_20181026_20181114_01_T1                          |
| Satellite: Sentinel-2 A |                                                                   |
| Sr #                    | Image ID                                                          |
| 1                       | S2A_MSIL1C_20151122T030012_N0204_R032_T49QHE_20151122T031003.SAFE |
| 2                       | S2A_MSIL1C_20151129T030132_N0204_R132_T49QHE_20151129T030135.SAFE |
| 3                       | S2A_MSIL1C_20161027T025812_N0204_R032_T49QHE_20161027T030825.SAFE |
| 4                       | S2A_MSIL1C_20161213T025122_N0204_R132_T49QHE_20161213T025452.SAFE |
| 5                       | S2A_MSIL1C_20161226T030122_N0204_R032_T49QHE_20161226T031105.SAFE |
| 6                       | S2A_MSIL1C_20170125T031131_N0204_R032_T49QHE_20170125T031125.SAFE |
| 7                       | S2A_MSIL1C_20170204T025911_N0204_R032_T49QHE_20170204T030840.SAFE |
| 8                       | S2A_MSIL1C_20170211T024831_N0204_R132_T49QHE_20170211T030102.SAFE |
| 9                       | S2A_MSIL1C_20170214T025811_N0204_R032_T49QHE_20170214T030309.SAFE |
| 10                      | S2A_MSIL1C_20170303T030131_N0204_R132_T49QHE_20170303T030130.SAFE |
| 11                      | S2A_MSIL1C_20170402T024541_N0204_R132_T50QKK_20170402T025302.SAFE |
| 12                      | S2A_MSIL1C_20170820T024551_N0205_R132_T49QHE_20170820T025553.SAFE |
| 13                      | S2A_MSIL1C_20170830T030141_N0205_R132_T49QHE_20170830T030137.SAFE |
| 14                      | S2A_MSIL1C_20171009T030141_N0205_R132_T49QHE_20171009T030135.SAFE |
| 15                      | S2A_MSIL1C_20171012T025641_N0205_R032_T49QHE_20171012T030305.SAFE |
| 16                      | S2A_MSIL1C_20171022T031131_N0205_R032_T49QHE_20171022T031132.SAFE |
| 17                      | S2A_MSIL1C_20171029T030141_N0206_R132_T49QHE_20171029T061656.SAFE |
| 18                      | S2A_MSIL1C_20171101T025841_N0206_R032_T49QHE_20171101T081621.SAFE |
| 19                      | S2A_MSIL1C_20171201T031131_N0206_R032_T49QHE_20171201T063008.SAFE |
| 20                      | S2A_MSIL1C_20171208T030131_N0206_R132_T49QHE_20171208T043254.SAFE |
| 21                      | S2A_MSIL1C_20171211T030121_N0206_R032_T49QHE_20171211T081928.SAFE |
| 22                      | S2A_MSIL1C_20171218T025121_N0206_R132_T49QHE_20171218T081023.SAFE |
| 23                      | S2A_MSIL1C_20180206T030131_N0206_R132_T49QHE_20180206T061829.SAFE |
| 24                      | S2A_MSIL1C_20180311T025541_N0206_R032_T49QHE_20180311T072620.SAFE |
| 25                      | S2A_MSIL1C_20180520T025551_N0206_R032_T49QHE_20180520T055054.SAFE |
| 26                      | S2A_MSIL1C_20181004T024541_N0206_R132_T49QHE_20181004T055531.SAFE |
| 27                      | S2A_MSIL1C_20181007T025601_N0206_R032_T49QGE_20181007T060436.SAFE |

|                         |                                                                   |
|-------------------------|-------------------------------------------------------------------|
| 28                      |                                                                   |
| 29                      | S2A_MSIL1C_20181106T025911_N0207_R032_T49QHE_20181106T060119      |
| Satellite: Sentinel-2 B |                                                                   |
| Sr #                    | Image ID                                                          |
| 1                       | S2B_MSIL1C_20170726T030139_N0205_R132_T49QHE_20170726T030136.SAFE |
| 2                       | S2B_MSIL1C_20170815T030139_N0205_R132_T49QHE_20170815T030134.SAFE |
| 3                       | S2B_MSIL1C_20170927T031119_N0205_R032_T49QHE_20170927T031118.SAFE |
| 4                       | S2B_MSIL1C_20171024T024739_N0206_R132_T49QHE_20171024T080627.SAFE |
| 5                       | S2B_MSIL1C_20171027T025809_N0206_R032_T49QHE_20171027T081633.SAFE |
| 6                       | S2B_MSIL1C_20171116T025949_N0206_R032_T49QHE_20171117T164022.SAFE |
| 7                       | S2B_MSIL1C_20171103T024839_N0206_R132_T49QHE_20171108T104817.SAFE |
| 8                       | S2B_MSIL1C_20171206T030059_N0206_R032_T49QHE_20171206T081708.SAFE |
| 9                       | S2B_MSIL1C_20180112T025049_N0206_R132_T49QHE_20180112T081030.SAFE |
| 10                      | S2B_MSIL1C_20180115T030049_N0206_R032_T49QHE_20180115T081848.SAFE |
| 11                      | S2B_MSIL1C_20180313T024539_N0206_R132_T49QHE_20180313T062237.SAFE |
| 12                      | S2B_MSIL1C_20180919T024539_N0206_R132_T49QHE_20180919T062444.SAFE |
| 13                      | S2B_MSIL1C_20181002T025539_N0206_R032_T49QHE_20181002T063512.SAFE |

**Table S3. Landsat-8 OLI and Sentinel 2-MSI A/B images used for Total suspended solids (TSS) time series analysis over Lake Chaohu.**

|                      |                                          |
|----------------------|------------------------------------------|
| Satellite: Landsat-8 |                                          |
| Sr #                 | Image ID                                 |
| 1                    | LC08_L1TP_121038_20130428_20170505_01_T1 |
| 2                    | LC08_L1TP_121038_20130514_20170504_01_T1 |
| 3                    | LC08_L1TP_121038_20130615_20170503_01_T1 |
| 4                    | LC08_L1TP_121038_20130701_20170503_01_T1 |
| 5                    | LC08_L1TP_121038_20130802_20170503_01_T1 |
| 6                    | LC08_L1TP_121038_20130818_20170503_01_T1 |
| 7                    | LC08_L1TP_121038_20130903_20170502_01_T1 |
| 8                    | LC08_L1TP_121038_20130919_20170502_01_T1 |
| 9                    | LC08_L1TP_121038_20131005_20170429_01_T1 |
| 10                   | LC08_L1TP_121038_20131021_20170429_01_T1 |
| 11                   | LC08_L1TP_121038_20131106_20170428_01_T1 |
| 12                   | LC08_L1TP_121038_20131122_20170428_01_T1 |
| 13                   | LC08_L1TP_121038_20140210_20170426_01_T1 |
| 14                   | LC08_L1TP_121038_20131106_20170428_01_T1 |
| 15                   | LC08_L1TP_121038_20140501_20170423_01_T1 |
| 16                   | LC08_L1TP_121038_20140720_20170421_01_T1 |
| 17                   | LC08_L1TP_121038_20140805_20170420_01_T1 |
| 18                   | LC08_L1TP_121038_20140821_20170420_01_T1 |
| 19                   | LC08_L1TP_121038_20140906_20170419_01_T1 |
| 20                   | LC08_L1TP_121038_20140922_20170419_01_T1 |
| 21                   | LC08_L1TP_121038_20141008_20180205_01_T1 |
| 22                   | LC08_L1TP_121038_20141024_20170418_01_T1 |

| 23                      | LC08_L1TP_121038_20141227_20170415_01_T1                          |
|-------------------------|-------------------------------------------------------------------|
| 24                      | LC08_L1TP_121038_20150213_20170413_01_T1                          |
| 25                      | LC08_L1TP_121038_20150301_20170412_01_T1                          |
| 26                      | LC08_L1TP_121038_20150824_20170405_01_T1                          |
| 27                      | LC08_L1TP_121038_20151011_20170403_01_T1                          |
| 28                      | LC08_L1TP_121038_20151027_20170402_01_T1                          |
| 29                      | LC08_L1TP_121038_20160115_20170405_01_T1                          |
| 30                      | LC08_L1TP_121038_20160506_20180205_01_T1                          |
| 31                      | LC08_L1TP_121038_20160623_20170323_01_T1                          |
| 32                      | LC08_L1TP_121038_20160709_20170323_01_T1                          |
| 33                      | LC08_L1TP_121038_20160725_20180205_01_T1                          |
| 34                      | LC08_L1TP_121038_20160810_20170322_01_T1                          |
| 35                      | LC08_L1TP_121038_20160927_20170320_01_T1                          |
| 36                      | LC08_L1TP_121038_20161114_20170318_01_T1                          |
| 37                      | LC08_L1TP_121038_20161216_20180205_01_T1                          |
| 38                      | LC08_L1TP_121038_20170101_20170312_01_T1                          |
| 39                      | LC08_L1TP_121038_20170218_20170228_01_T1                          |
| 40                      | LC08_L1TP_121038_20170423_20170502_01_T1                          |
| 41                      | LC08_L1TP_121038_20170509_20170516_01_T1                          |
| 42                      | LC08_L1TP_121038_20170525_20170614_01_T1                          |
| 43                      | LC08_L1TP_121038_20170728_20170810_01_T1                          |
| 44                      | LC08_L1TP_121038_20171101_20171109_01_T1                          |
| 45                      | LC08_L1TP_121038_20171203_20171207_01_T1                          |
| 46                      | LC08_L1TP_121038_20171219_20171224_01_T1                          |
| 47                      | LC08_L1TP_121038_20180309_20180320_01_T1                          |
| 48                      | LC08_L1TP_121038_20180410_20180417_01_T1                          |
| 49                      | LC08_L1TP_121038_20180613_20180615_01_T1                          |
| 50                      | LC08_L1TP_121038_20180629_20180716_01_T1                          |
| 51                      | LC08_L1TP_121038_20180731_20180814_01_T1                          |
| 52                      | LC08_L1TP_121038_20181003_20181010_01_T1                          |
| 53                      | LC08_L1TP_121038_20181120_20181129_01_T1                          |
| Satellite: Sentinel-2 A |                                                                   |
| Sr #                    | Image ID                                                          |
| 1                       | S2A_MSIL1C_20160616T024552_N0204_R132_T50RNV_20160616T025728.SAFE |
| 2                       | S2A_MSIL1C_20160726T024552_N0204_R132_T50RNV_20160726T025328.SAFE |
| 3                       | S2A_MSIL1C_20160815T024552_N0204_R132_T50RNV_20160815T025537.SAFE |
| 4                       | S2A_MSIL1C_20161103T024852_N0204_R132_T50RNV_20161103T025456.SAFE |
| 5                       | S2A_MSIL1C_20170211T024831_N0204_R132_T50RNV_20170211T025103.SAFE |
| 6                       | S2A_MSIL1C_20170422T024551_N0204_R132_T50RNV_20170422T025553.SAFE |
| 7                       | S2A_MSIL1C_20170711T024551_N0205_R132_T50RNV_20170711T025552.SAFE |
| 8                       | S2A_MSIL1C_20170731T024551_N0205_R132_T50RNV_20170731T025553.SAFE |
| 9                       | S2A_MSIL1C_20171009T025721_N0205_R132_T50RNV_20171009T025721.SAFE |
| 10                      | S2A_MSIL1C_20171218T025121_N0206_R132_T50RNV_20171218T062338.SAFE |
| 11                      | S2A_MSIL1C_20180226T024651_N0206_R132_T50RNV_20180226T053705.SAFE |
| 12                      | S2A_MSIL1C_20180328T024651_N0206_R132_T50RNV_20180328T080726.SAFE |
| 13                      | S2A_MSIL1C_20180407T024551_N0206_R132_T50RNV_20180407T054634.SAFE |

|                         |                                                                   |
|-------------------------|-------------------------------------------------------------------|
| 14                      | S2A_MSIL1C_20180417T024551_N0206_R132_T50RNV_20180417T062318.SAFE |
| 15                      | S2A_MSIL1C_20180606T024651_N0206_R132_T50RNV_20180606T062402.SAFE |
| 16                      | S2A_MSIL1C_20180716T024551_N0206_R132_T50RNV_20180716T053144.SAFE |
| 17                      | S2A_MSIL1C_20180805T024551_N0206_R132_T50RNV_20180805T054920.SAFE |
| 18                      | S2A_MSIL1C_20180815T024551_N0206_R132_T50RNV_20180815T074027.SAFE |
| 19                      | S2A_MSIL1C_20180904T024541_N0206_R132_T50RNV_20180904T053814.SAFE |
| 20                      | S2A_MSIL1C_20180914T024541_N0206_R132_T50RNV_20180914T053307.SAFE |
| 21                      | S2A_MSIL1C_20181004T024541_N0206_R132_T50RNV_20181004T055531.SAFE |
| 22                      | S2A_MSIL1C_20181024T024751_N0206_R132_T50RNV_20181024T073519.SAFE |
| 23                      | S2A_MSIL1C_20181103T024851_N0206_R132_T50RNV_20181103T043809.SAFE |
| 24                      | S2A_MSIL1C_20181113T024941_N0207_R132_T50RNV_20181113T043656.SAFE |
| 25                      | S2A_MSIL1C_20181123T025021_N0207_R132_T50RNV_20181123T062205.SAFE |
| 26                      | S2A_MSIL1C_20181213T025111_N0207_R132_T50RNV_20181213T043625.SAFE |
| 27                      | S2A_MSIL1C_20181223T025121_N0207_R132_T50RNV_20181223T043638.SAFE |
| Satellite: Sentinel-2 B |                                                                   |
| Sr #                    | Image ID                                                          |
| 1                       | S2B_MSIL1C_20170805T024549_N0205_R132_T50RNV_20170805T025732.SAFE |
| 2                       | S2B_MSIL1C_20170825T024539_N0205_R132_T50RNV_20170825T025536.SAFE |
| 3                       | S2B_MSIL1C_20171024T024739_N0206_R132_T50RNV_20171024T080627.SAFE |
| 4                       | S2B_MSIL1C_20171123T025009_N0206_R132_T50RNV_20171123T073353.SAFE |
| 5                       | S2B_MSIL1C_20180112T025049_N0206_R132_T50RNV_20180112T062213.SAFE |
| 6                       | S2B_MSIL1C_20180313T024539_N0206_R132_T50RNV_20180313T062237.SAFE |
| 7                       | S2B_MSIL1C_20180402T024539_N0206_R132_T50RNV_20180402T054145.SAFE |
| 8                       | S2B_MSIL1C_20180601T024539_N0206_R132_T50RNV_20180601T053658.SAFE |
| 9                       | S2B_MSIL1C_20180611T024549_N0206_R132_T50RNV_20180611T062255.SAFE |
| 10                      | S2B_MSIL1C_20180731T024539_N0206_R132_T50RNV_20180731T052239.SAFE |
| 11                      | S2B_MSIL1C_20180810T024539_N0206_R132_T50RNV_20180810T053506.SAFE |
| 12                      | S2B_MSIL1C_20180830T024539_N0206_R132_T50RNV_20180830T052553.SAFE |
| 13                      | S2B_MSIL1C_20180909T024539_N0206_R132_T50RNV_20180909T062442.SAFE |
| 14                      | S2B_MSIL1C_20180919T024539_N0206_R132_T50RNV_20180919T062444.SAFE |
| 15                      | S2B_MSIL1C_20180929T024539_N0206_R132_T50RNV_20180929T062221.SAFE |
| 16                      | S2B_MSIL1C_20181029T024819_N0206_R132_T50RNV_20181029T052535.SAFE |
| 17                      | S2B_MSIL1C_20181128T025039_N0207_R132_T50RNV_20181128T062134.SAFE |
| 18                      | S2B_MSIL1C_20181218T025119_N0207_R132_T50RNV_20181218T043534.SAFE |

**Table S4. Landsat-8 OLI and Sentinel 2-MSI A/B images used for floating algal area comparison.**

| Location    | Landsat OLI |            |                   |                     |                    | Sentinel-2 MSI |         |            |                   |                     |                    |
|-------------|-------------|------------|-------------------|---------------------|--------------------|----------------|---------|------------|-------------------|---------------------|--------------------|
|             | Row/Path    | Date       | Scene Center Time | Solar Azimuth Angle | Solar Zenith Angle | Satellite      | Tile ID | Date       | Scene Center Time | Solar Azimuth Angle | Solar Zenith Angle |
| Lake Tai Hu | 119/38      | 2020/05/30 | 02:30             | 124.66              | 25.05              | S-2A           | T51RTQ  | 2020/05/30 | 02:49             | 131.76              | 21.4               |
| Chaohu Lake | 121/38      | 2019/11/23 | 02:43             | 158.92              | 54.87              | S-2B           | T50RNV  | 2019/11/23 | 02:50             | 163.31              | 53.16              |
|             |             |            |                   |                     |                    | S-2B           | T50SNA  | 2019/11/23 | 02:58             | 163.44              | 54.04              |
| Dian lake   | 129/43      | 2018/04/02 | 03:34             | 126.31              | 30.47              | S-2A           | T48RTN  | 2018/04/02 | 03:38             | 132.01              | 28.00              |
| Ebinur Lake | 146/29      | 2019/04/12 | 05:13             | 149.45              | 39.68              | S-2B           | T44TPQ  | 2019/04/12 | 05:26             | 154.65              | 38.52              |

**Table S5. Landsat-8 OLI and Sentinel 2-MSI A/B images used for floating algal bloom tracking over the Yellow Sea.**

| Sr. # | Date      | Sensor      | Image ID                                                     |
|-------|-----------|-------------|--------------------------------------------------------------|
| 1     | 2019/6/2  | Landsat-8   | LC08_L1TP_119036_20190602_20190605_01_T1                     |
| 2     | 2019/6/2  | Landsat-8   | LC08_L1TP_119035_20190602_20190605_01_T1                     |
| 3     | 2019/6/8  | Sentinel-2A | S2A_MSIL1C_20190608T023551_N0207_R089_T51STU_20190608T053558 |
| 4     | 2019/6/8  | Sentinel-2A | S2A_MSIL1C_20190608T023551_N0207_R089_T51SUS_20190608T053558 |
| 5     | 2019/6/8  | Sentinel-2A | S2A_MSIL1C_20190608T023551_N0207_R089_T51SUT_20190608T053558 |
| 6     | 2019/6/8  | Sentinel-2A | S2A_MSIL1C_20190608T023551_N0207_R089_T51SUU_20190608T053558 |
| 7     | 2019/6/8  | Sentinel-2A | S2A_MSIL1C_20190608T023551_N0207_R089_T51SUV_20190608T053558 |
| 8     | 2019/6/8  | Sentinel-2A | S2A_MSIL1C_20190608T023551_N0207_R089_T51SVT_20190608T053558 |
| 9     | 2019/6/8  | Sentinel-2A | S2A_MSIL1C_20190608T023551_N0207_R089_T51STT_20190608T053558 |
| 10    | 2019/6/8  | Sentinel-2A | S2A_MSIL2A_20190608T023551_N0212_R089_T51STV_20190608T061511 |
| 11    | 2019/6/11 | Landsat-8   | LC08_L1GT_118036_20190611_20190619_01_T2                     |
| 12    | 2019/6/11 | Landsat-8   | LC08_L1GT_118037_20190611_20190619_01_T2                     |
| 13    | 2019/6/11 | Sentinel-2A | S2A_MSIL1C_20190611T024551_N0207_R132_T50SQD_20190611T052620 |
| 14    | 2019/6/11 | Sentinel-2A | S2A_MSIL1C_20190611T024551_N0207_R132_T51STA_20190611T043627 |

|    |           |             |                                                              |
|----|-----------|-------------|--------------------------------------------------------------|
| 15 | 2019/6/11 | Sentinel-2A | S2A_MSIL1C_20190611T024551_N0207_R132_T51STU_20190611T052620 |
| 16 | 2019/6/11 | Sentinel-2A | S2A_MSIL1C_20190611T024551_N0207_R132_T51STV_20190611T043627 |
| 17 | 2019/6/13 | Sentinel-2B | S2B_MSIL1C_20190613T023559_N0207_R089_T51STV_20190613T042509 |
| 18 | 2019/6/13 | Sentinel-2B | S2B_MSIL1C_20190613T023559_N0207_R089_T51SUA_20190613T042509 |
| 19 | 2019/6/13 | Sentinel-2B | S2B_MSIL1C_20190613T023559_N0207_R089_T51SUV_20190613T042509 |
| 20 | 2019/6/13 | Sentinel-2B | S2B_MSIL1C_20190613T023559_N0207_R089_T51SVA_20190613T042509 |
| 21 | 2019/6/13 | Sentinel-2B | S2B_MSIL1C_20190613T023559_N0207_R089_T51SVV_20190613T042509 |
| 22 | 2019/6/13 | Sentinel-2B | S2B_MSIL1C_20190613T023559_N0207_R089_T51SWA_20190613T042509 |
| 23 | 2019/6/18 | Landsat-8   | LC08_L1TP_119035_20190618_20190703_01_T1                     |
| 24 | 2019/6/18 | Landsat-8   | LC08_L1GT_119036_20190618_20190703_01_T2                     |
| 25 | 2019/6/18 | Sentinel-2A | S2A_MSIL1C_20190618T023551_N0207_R089_T51STA_20190618T042557 |
| 26 | 2019/6/18 | Sentinel-2A | S2A_MSIL1C_20190618T023551_N0207_R089_T51STU_20190618T042557 |
| 27 | 2019/6/18 | Sentinel-2A | S2A_MSIL1C_20190618T023551_N0207_R089_T51STV_20190618T042557 |
| 28 | 2019/6/18 | Sentinel-2A | S2A_MSIL1C_20190618T023551_N0207_R089_T51SUA_20190618T042557 |
| 29 | 2019/6/18 | Sentinel-2A | S2A_MSIL1C_20190618T023551_N0207_R089_T51SUU_20190618T042557 |
| 30 | 2019/6/18 | Sentinel-2A | S2A_MSIL1C_20190618T023551_N0207_R089_T51SUV_20190618T042557 |
| 31 | 2019/6/18 | Sentinel-2A | S2A_MSIL1C_20190618T023551_N0207_R089_T51SVA_20190618T042557 |
| 32 | 2019/6/18 | Sentinel-2A | S2A_MSIL1C_20190618T023551_N0207_R089_T51SVV_20190618T042557 |
| 33 | 2019/6/18 | Sentinel-2A | S2A_MSIL1C_20190618T023551_N0207_R089_T51SWV_20190618T042557 |
| 34 | 2019/6/23 | Sentinel-2B | S2B_MSIL1C_20190623T023559_N0207_R089_T51STU_20190705T221722 |
| 35 | 2019/6/23 | Sentinel-2B | S2B_MSIL1C_20190623T023559_N0207_R089_T51SVV_20190705T221722 |
| 36 | 2019/6/23 | Sentinel-2B | S2B_MSIL1C_20190623T023559_N0207_R089_T51SVU_20190705T221722 |
| 37 | 2019/6/23 | Sentinel-2B | S2B_MSIL1C_20190623T023559_N0207_R089_T51SUT_20190705T221722 |
| 38 | 2019/6/23 | Sentinel-2B | S2B_MSIL1C_20190623T023559_N0207_R089_T51SUU_20190705T221722 |
| 39 | 2019/6/23 | Sentinel-2B | S2B_MSIL1C_20190623T023559_N0207_R089_T51SUV_20190705T221722 |
| 40 | 2019/6/23 | Sentinel-2B | S2B_MSIL1C_20190623T023559_N0207_R089_T51SVT_20190705T221722 |
| 41 | 2019/6/23 | Sentinel-2B | S2B_MSIL1C_20190623T023559_N0207_R089_T51STV_20190705T221722 |
| 42 | 2019/6/23 | Sentinel-2B | S2B_MSIL1C_20190623T023559_N0207_R089_T51STA_20190705T221722 |
| 43 | 2019/6/23 | Sentinel-2B | S2B_MSIL1C_20190623T023559_N0207_R089_T51SVA_20190705T221722 |
| 44 | 2019/6/23 | Sentinel-2B | S2B_MSIL1C_20190623T023559_N0207_R089_T51SUS_20190705T221722 |
| 45 | 2019/6/23 | Sentinel-2B | S2B_MSIL1C_20190623T023559_N0207_R089_T51SUA_20190705T221722 |
| 46 | 2019/6/23 | Sentinel-2B | S2B_MSIL1C_20190623T023559_N0207_R089_T51STT_20190705T221722 |
| 47 | 2019/7/3  | Sentinel-2B | S2B_MSIL1C_20190703T023559_N0207_R089_T51STA_20190703T061035 |



|    |           |             |                                                              |
|----|-----------|-------------|--------------------------------------------------------------|
| 48 | 2019/7/3  | Sentinel-2B | S2B_MSIL1C_20190703T023559_N0207_R089_T51STU_20190703T061035 |
| 49 | 2019/7/3  | Sentinel-2B | S2B_MSIL1C_20190703T023559_N0207_R089_T51STV_20190703T061035 |
| 50 | 2019/7/3  | Sentinel-2B | S2B_MSIL1C_20190703T023559_N0207_R089_T51SUA_20190703T061035 |
| 51 | 2019/7/3  | Sentinel-2B | S2B_MSIL1C_20190703T023559_N0207_R089_T51SUU_20190703T061035 |
| 52 | 2019/7/3  | Sentinel-2B | S2B_MSIL1C_20190703T023559_N0207_R089_T51SUV_20190703T061035 |
| 54 | 2019/7/3  | Sentinel-2B | S2B_MSIL1C_20190703T023559_N0207_R089_T51SVA_20190703T061035 |
| 53 | 2019/7/3  | Sentinel-2B | S2B_MSIL1C_20190703T023559_N0207_R089_T51SVU_20190703T061035 |
| 54 | 2019/7/4  | Landsat-8   | LC08_L1TP_119035_20190704_20190718_01_T1                     |
| 55 | 2019/7/4  | Landsat-8   | LC08_L1TP_119034_20190704_20190718_01_T1                     |
| 56 | 2019/7/8  | Sentinel-2A | S2A_MSIL1C_20190708T023551_N0207_R089_T51STV_20190708T053409 |
| 57 | 2019/7/8  | Sentinel-2A | S2A_MSIL1C_20190708T023551_N0207_R089_T51SUA_20190708T053409 |
| 58 | 2019/7/8  | Sentinel-2A | S2A_MSIL1C_20190708T023551_N0207_R089_T51SUU_20190708T053409 |
| 59 | 2019/7/8  | Sentinel-2A | S2A_MSIL1C_20190708T023551_N0207_R089_T51SUV_20190708T053409 |
| 60 | 2019/7/8  | Sentinel-2A | S2A_MSIL1C_20190708T023551_N0207_R089_T51SVA_20190708T053409 |
| 61 | 2019/7/8  | Sentinel-2A | S2A_MSIL1C_20190708T023551_N0207_R089_T51SVT_20190708T053409 |
| 62 | 2019/7/8  | Sentinel-2A | S2A_MSIL1C_20190708T023551_N0207_R089_T51SVU_20190708T053409 |
| 63 | 2019/7/8  | Sentinel-2A | S2A_MSIL1C_20190708T023551_N0207_R089_T51SVV_20190708T053409 |
| 64 | 2019/7/11 | Landsat-8   | LC08_L1TP_120036_20190711_20190719_01_T1                     |
| 65 | 2019/7/11 | Landsat-8   | LC08_L1TP_120035_20190711_20190719_01_T1                     |
| 66 | 2019/7/13 | Sentinel-2B | S2B_MSIL1C_20190713T023559_N0208_R089_T50SQD_20190713T042513 |
| 67 | 2019/7/13 | Sentinel-2B | S2B_MSIL1C_20190713T023559_N0208_R089_T51STA_20190713T042513 |
| 68 | 2019/7/13 | Sentinel-2B | S2B_MSIL1C_20190713T023559_N0208_R089_T51STT_20190713T042513 |
| 69 | 2019/7/13 | Sentinel-2B | S2B_MSIL1C_20190713T023559_N0208_R089_T51STU_20190713T042513 |
| 70 | 2019/7/13 | Sentinel-2B | S2B_MSIL1C_20190713T023559_N0208_R089_T51STV_20190713T042513 |
| 71 | 2019/7/13 | Sentinel-2B | S2B_MSIL1C_20190713T023559_N0208_R089_T51SUA_20190713T042513 |
| 72 | 2019/7/13 | Sentinel-2B | S2B_MSIL1C_20190713T023559_N0208_R089_T51SUT_20190713T042513 |
| 73 | 2019/7/13 | Sentinel-2B | S2B_MSIL1C_20190713T023559_N0208_R089_T51SUU_20190713T042513 |
| 74 | 2019/7/13 | Sentinel-2B | S2B_MSIL1C_20190713T023559_N0208_R089_T51SUV_20190713T042513 |
| 75 | 2019/7/13 | Sentinel-2B | S2B_MSIL1C_20190713T023559_N0208_R089_T51SVA_20190713T042513 |
| 76 | 2019/7/20 | Landsat-8   | LC08_L1TP_119036_20190720_20190731_01_T2                     |
| 78 | 2019/7/20 | Landsat-8   | LC08_L1TP_119035_20190720_20190731_01_T1                     |
| 79 | 2019/7/26 | Sentinel-2B | S2B_MSIL1C_20190726T024559_N0208_R132_T50SQE_20190726T053202 |
| 80 | 2019/7/26 | Sentinel-2B | S2B_MSIL1C_20190726T024559_N0208_R132_T50SQF_20190726T053202 |

|    |           |             |                                                              |
|----|-----------|-------------|--------------------------------------------------------------|
| 81 | 2019/7/26 | Sentinel-2B | S2B_MSIL1C_20190726T024559_N0208_R132_T51STA_20190726T053202 |
| 82 | 2019/7/26 | Sentinel-2B | S2B_MSIL1C_20190726T024559_N0208_R132_T51STV_20190726T053202 |
| 83 | 2019/7/26 | Sentinel-2B | S2B_MSIL1C_20190726T024559_N0208_R132_T51SUA_20190726T053202 |

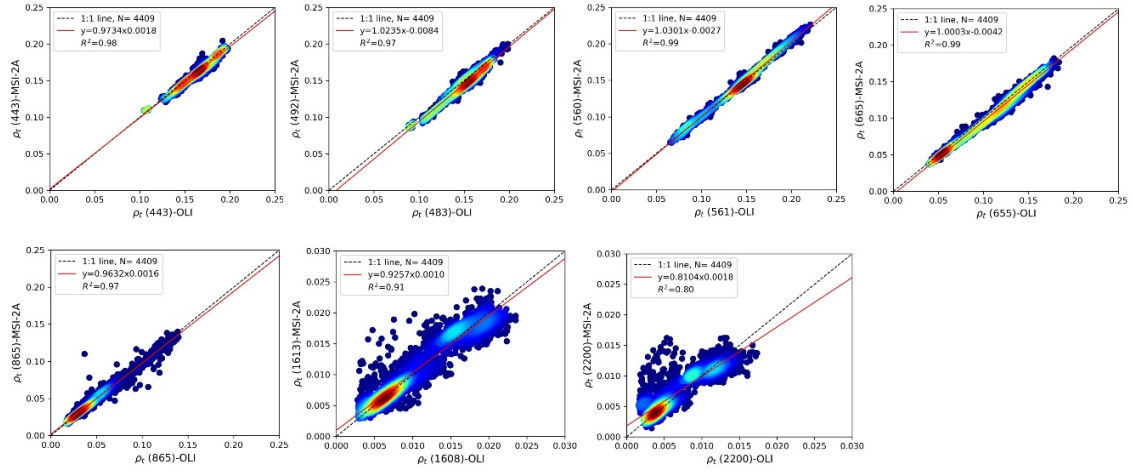

Figure S1. Inter-comparison of Top of atmosphere reflectance ( $\rho_t$ ) for OLI – MSI-A pairs.

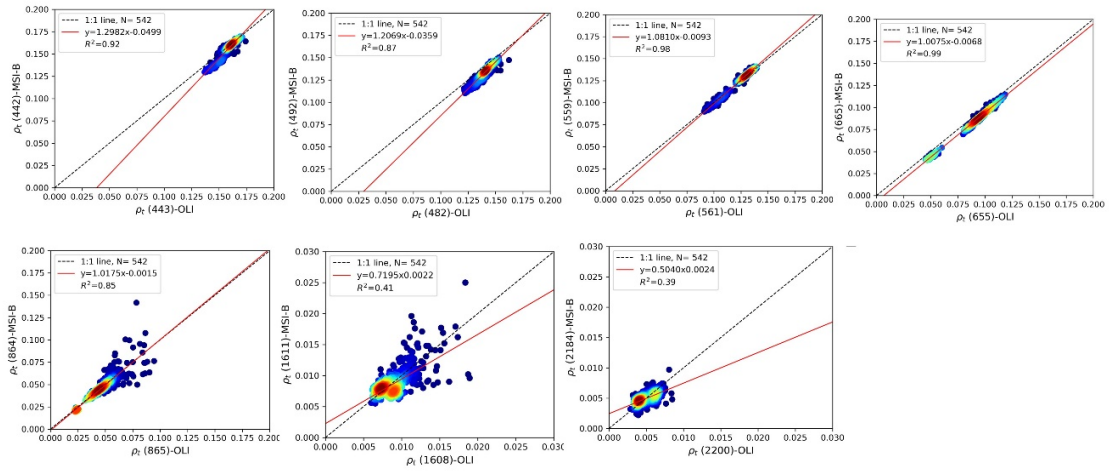

Figure S2. Inter-comparison of Top of atmosphere reflectance ( $\rho_t$ ) for OLI – MSI-B pairs.

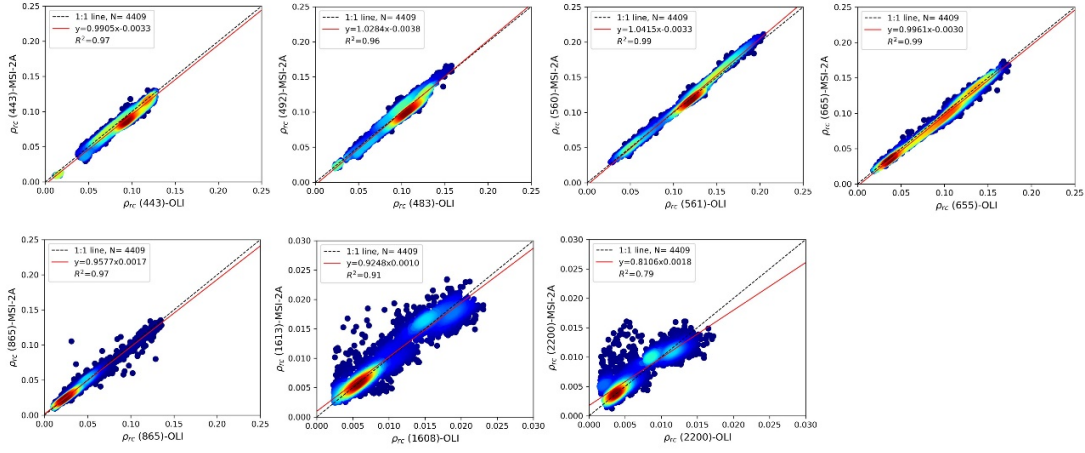

Figure S3. Inter-comparison of Rayleigh corrected reflectance ( $\rho_{rc}$ ) for OLI – MSI-A pairs.

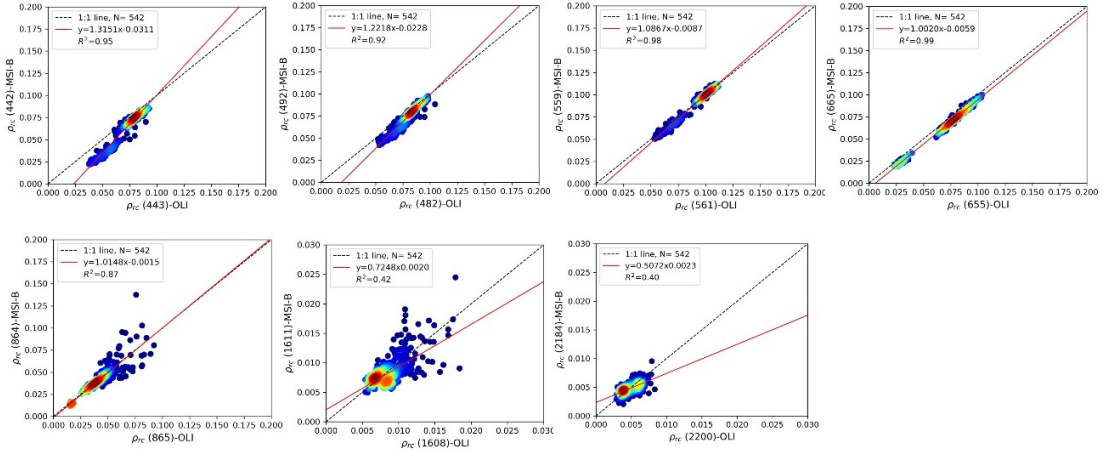

Figure S4. Inter-comparison of Rayleigh corrected reflectance ( $\rho_{rc}$ ) for OLI – MSI-B pairs.

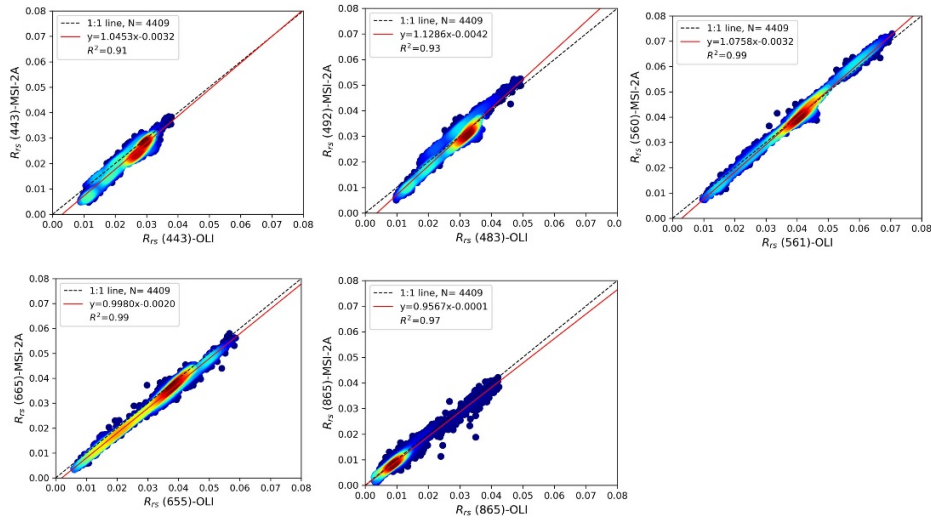

Figure S5. Inter-comparison of remote sensing reflectance ( $R_{rs}$ ) for OLI – MSI-A pairs.

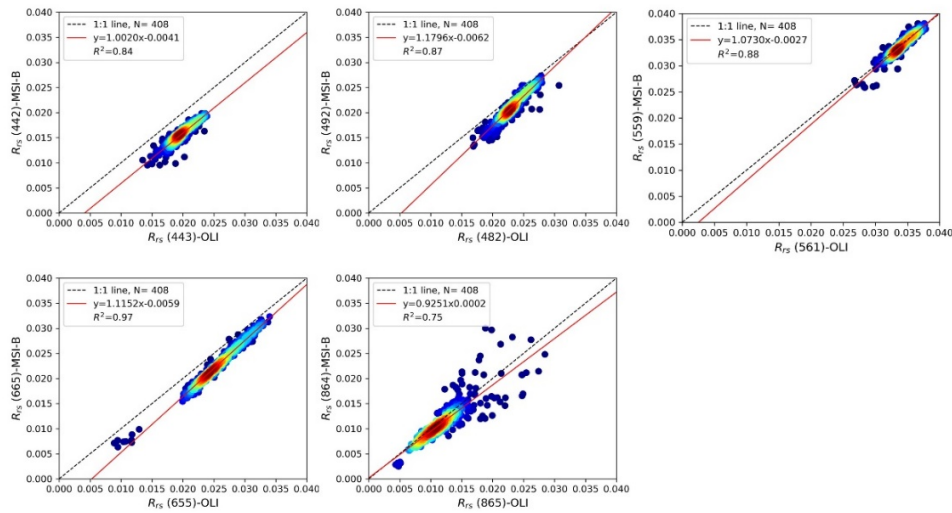

Figure S6. Inter-comparison of remote sensing reflectance ( $R_{rs}$ ) for OLI – MSI-B pairs.
